# Supplementary material
Source: PubMed Central journal article supplement (PMC6345376)
Supplement: NIHMS81202-supplement-S2-S4.pdf [file NIHMS81202-supplement-S2-S4.pdf]

## **New Phytologist Supporting Information**

Article title: Nutrient-rich plants emit a less intense blend of volatile isoprenoids

Authors: M. Fernández-Martínez, J. Llusà, I. Filella, Ü. Niinemets, A. Arneth, I. J. Wright, F. Loreto, and J. Peñuelas

Article acceptance date: 16 October 2017

The following Supporting Information is available for this article:

### **Table S1: Description of the spread sheet containing the data used in this paper fernandez\_martinez\_et\_al\_bvocs.xlsx).**

**isp.mass:** Isoprene, emission rate ( $\mu\text{g g}^{-1} \text{h}^{-1}$ ).

**mtp.mass:** Monoterpenes, emission rate ( $\mu\text{g g}^{-1} \text{h}^{-1}$ ).

**LMA:** Leaf mass per area ( $\text{g cm}^{-2}$ )

**Foliar N:** Foliar N concentration (% dry weight)

**Foliar P:** Foliar P concentration (% dry weight)

**Foliar N:P:** Foliar N:P ratio (unitless)

**MAT:** Mean annual temperature (Celsius degrees)

**MAP:** Mean annual precipitation ( $\text{mm y}^{-1}$ )

**PC1:** Factor scores for axis 1 in the phylogenetic PCA (**Figure 1**)

**PC2:** Factor scores for axis 2 in the phylogenetic PCA (**Figure 1**)

**Table S2 Literature used to extract data for isoprenoid emissions. Numbers match with supplementary references at the end of supplementary material.**

| <b>Species</b>                  | <b>References</b> | <b>Species</b>                 | <b>References</b>           |
|---------------------------------|-------------------|--------------------------------|-----------------------------|
| <i>Acacia karroo</i>            | 1                 | <i>Eucalyptus grandis</i>      | 28,31                       |
| <i>Acacia nigrescens</i>        | 2,3               | <i>Eucalyptus viminalis</i>    | 31                          |
| <i>Acacia nilotica</i>          | 1,3               | <i>Fagus sylvatica</i>         | 32,33                       |
| <i>Acacia tortilis</i>          | 2,3               | <i>Ficus fistulosa</i>         | 15,25                       |
| <i>Adenostoma fasciculatum</i>  | 4-6               | <i>Ficus microcarpa</i>        | 15,19,21,25                 |
| <i>Amelanchier alnifolia</i>    | 7                 | <i>Ficus racemosa</i>          | 15,25                       |
| <i>Arbutus unedo</i>            | 8-12              | <i>Ginkgo biloba</i>           | 7,34-36                     |
| <i>Artemisia tridentata</i>     | 7                 | <i>Grevillea robusta</i>       | 21,37,30                    |
| <i>Atriplex canescens</i>       | 7,13,14           | <i>Helichrysum stoechas</i>    | 8,9,11,12                   |
| <i>Betula ermanii</i>           | 15                | <i>Juglans regia</i>           | 4,6,35,38                   |
| <i>Betula fruticosa</i>         | 15                | <i>Juniperus oxycedrus</i>     | 8,9,11,12                   |
| <i>Betula nana</i>              | 16                | <i>Juniperus phoenicea</i>     | 8,9,11,12                   |
| <i>Betula pendula</i>           | 17,18             | <i>Kalmia latifolia</i>        | 7                           |
| <i>Betula platyphylla</i>       | 15                | <i>Larix laricina</i>          | 23                          |
| <i>Betula pubescens</i>         | 17                | <i>Lavandula stoechas</i>      | 8,9,10,12                   |
| <i>Bischofia javanica</i>       | 19                | <i>Ledum palustre</i>          | 15,39                       |
| <i>Brachypodium retusum</i>     | 8,9,12            | <i>Leucaena leucocephala</i>   | 19,21                       |
| <i>Brachystegia spiciformis</i> | 1                 | <i>Liquidambar styraciflua</i> | 27,34,40,41,42              |
| <i>Burkea africana</i>          | 1,2               | <i>Maackia amurensis</i>       | 15                          |
| <i>Buxus sempervirens</i>       | 8,9,12            | <i>Mallotus paniculatus</i>    | 15                          |
| <i>Carpinus betulus</i>         | 20                | <i>Mangifera indica</i>        | 21,25,30,43                 |
| <i>Castanea dentata</i>         | 7                 | <i>Medicago sativa</i>         | 4,6,27,38                   |
| <i>Casuarina equisetifolia</i>  | 21                | <i>Myrtus communis</i>         | 8,9,11,12,26,               |
| <i>Ceratonia siliqua</i>        | 22                | <i>Nerium oleander</i>         | 8,9,12                      |
| <i>Chamaedaphne calyculata</i>  | 23                | <i>Olea europaea</i>           | 4,6,8,9,12,22,44,38,        |
| <i>Cistus albidus</i>           | 8,9,11,12         | <i>Oryza sativa</i>            | 6                           |
| <i>Combretum molle</i>          | 2                 | <i>Ostrya virginiana</i>       | 23                          |
| <i>Cyrilla racemiflora</i>      | 24                | <i>Phillyrea angustifolia</i>  | 8,9,11,12,                  |
| <i>Cytisus scoparius</i>        | 8                 | <i>Picea abies</i>             | 23,45-49                    |
| <i>Daucus carota</i>            | 4,6               | <i>Picea glauca</i>            | 23,49                       |
| <i>Dimocarpus longan</i>        | 25                | <i>Picea mariana</i>           | 23,49,50                    |
| <i>Diospyros texana</i>         | 14                | <i>Picea sitchensis</i>        | 27,51,53,55                 |
| <i>Dorycnium pentaphyllum</i>   | 8,9,12            | <i>Pinus halepensis</i>        | 8,9,10,12,34,56,57,44,58,59 |
| <i>Erica arborea</i>            | 8,9,11,12,26      | <i>Pinus koraiensis</i>        | 15                          |
| <i>Erica multiflora</i>         | 8,9,11,12         | <i>Pinus pinea</i>             | 8,9,10,11,12,34,60-64       |
| <i>Eucalyptus globulus</i>      | 27-30             | <i>Pinus sylvestris</i>        | 39,46-48,65-67,             |

**Table S1:** Continuation.

| <b>Species</b>                | <b>References</b>                     | <b>Species</b>                 | <b>References</b> |
|-------------------------------|---------------------------------------|--------------------------------|-------------------|
| <i>Pinus tabuliformis</i>     | 15                                    | <i>Quercus suber</i>           | 37,78,79          |
| <i>Pistacia lentiscus</i>     | 8,9,12,26                             | <i>Rhamnus lycioides</i>       | 8,9,12            |
| <i>Platycladus orientalis</i> | 15                                    | <i>Robinia pseudoacacia</i>    | 15,27,40          |
| <i>Populus balsamifera</i>    | 68                                    | <i>Rosmarinus officinalis</i>  | 8,10,26,37,44     |
| <i>Populus deltoides</i>      | 27,40,69                              | <i>Salix phylicifolia</i>      | 16,18             |
| <i>Populus nigra</i>          | 8,9,12,69                             | <i>Salix rosmarinifolia</i>    | 15                |
| <i>Populus tremula</i>        | 18,39,70                              | <i>Salix viminalis</i>         | 15                |
| <i>Populus tremuloides</i>    | 23,27,71,72                           | <i>Salvia mellifera</i>        | 5,27              |
| <i>Prunus avium</i>           | 4,6,38                                | <i>Schima superba</i>          | 15                |
| <i>Pseudotsuga menziesii</i>  | 68,73-76                              | <i>Schima wallichii</i>        | 15,19             |
| <i>Psidium guajava</i>        | 21,30                                 | <i>Schizachyrium scoparium</i> | 14                |
| <i>Quercus cerris</i>         | 8,9,11,12,77-79                       | <i>Syzygium jambos</i>         | 15                |
| <i>Quercus chrysolepis</i>    | 40,77                                 | <i>Taxodium distichum</i>      | 15,36             |
| <i>Quercus coccifera</i>      | 8,9,12,58,80,81                       | <i>Terminalia bellirica</i>    | 15,30             |
| <i>Quercus ilex</i>           | 8,9,11,12,22,56-58,<br>60-62,64,82-89 | <i>Thymus vulgaris</i>         | 8,9,10,12         |
| <i>Quercus lobata</i>         | 4,6,38,40                             | <i>Tilia americana</i>         | 7,23              |
| <i>Quercus mongolica</i>      | 15,90                                 | <i>Trema orientalis</i>        | 3,15              |
| <i>Quercus petraea</i>        | 20,79                                 | <i>Triticum aestivum</i>       | 6,27              |
| <i>Quercus pubescens</i>      | 8,9,12,79,84,85                       | <i>Ulex europaeus</i>          | 92,93             |
| <i>Quercus robur</i>          | 39,70,91                              | <i>Ulex parviflorus</i>        | 8,12              |
|                               |                                       | <i>Vaccinium uliginosum</i>    | 15,68             |

**Table S3:** Loadings of the phylogenetic PCA shown in Figure 1. The coefficients whose absolute value was higher than 0.6 are highlighted in bold. Estimated lambda was 0.55.

|                               | <b>PC1</b>     | <b>PC2</b>     |
|-------------------------------|----------------|----------------|
| <b>LMA</b>                    | <b>0.6016</b>  | 0.3285         |
| <b>MAP</b>                    | -0.1094        | 0.0053         |
| <b>MAT</b>                    | 0.3601         | -0.2316        |
| <b>Foliar N</b>               | <b>-0.6435</b> | -0.0915        |
| <b>Foliar P</b>               | <b>-0.6242</b> | <b>0.6995</b>  |
| <b>Foliar N:P</b>             | 0.3414         | <b>-0.8691</b> |
| <b>Woody</b>                  | 0.0237         | 0.1272         |
| <b>Deciduous</b>              | <b>-0.8082</b> | -0.3180        |
| <b>Evergreen</b>              | <b>0.8538</b>  | 0.3523         |
| <b>Variance explained (%)</b> | 31.2           | 18.4           |

**Table S4:** Average AICc (second-order Akaike information criterion) values for the Brownian motion (BM1, BMS) and generalised Ornstein-Uhlenbeck-based Hansen (OU1, OUM, OUMV) models for foliar nitrogen concentration (N), foliar phosphorus concentration (P), foliar N:P ratio, leaf mass per area (LMA), mean annual temperature (MAT), and mean annual precipitation (MAP). The difference between each of the model's AICc and the model with the lowest AICc is shown under the heading  $\Delta$ AICc. Average AICc values were calculated using the subset of models in which none of them presented negative eigenvalues (sound models).

|                                       | <b>BM1</b> | <b>BMS</b> | <b>OU1</b> | <b>OUM</b> | <b>OUMV</b> |
|---------------------------------------|------------|------------|------------|------------|-------------|
| <b><i>AICc</i></b>                    |            |            |            |            |             |
| <b>N</b>                              | 205.26     | 123.46     | 31.45      | 16.36      | 0.00        |
| <b>P</b>                              | 69.78      | 26.00      | -114.70    | -114.14    | -112.77     |
| <b>NP</b>                             | 0.00       | -76.39     | -130.47    | -131.84    | -195.55     |
| <b>LMA</b>                            | 0.00       | -144.78    | -206.81    | -207.22    | -225.65     |
| <b>MAT</b>                            | 0.00       | -132.08    | -220.73    | -221.06    | -215.40     |
| <b>MAP</b>                            | 120.82     | 77.47      | 2.68       | 5.15       | 1.23        |
| <b><i><math>\Delta</math>AICc</i></b> |            |            |            |            |             |
| <b>N</b>                              | 205.26     | 123.46     | 31.45      | 16.36      | 0.00        |
| <b>P</b>                              | 184.48     | 140.70     | 0.00       | 0.56       | 1.93        |
| <b>NP</b>                             | 195.55     | 119.16     | 65.08      | 63.70      | 0.00        |
| <b>LMA</b>                            | 225.65     | 80.87      | 18.85      | 18.43      | 0.00        |
| <b>MAT</b>                            | 221.06     | 88.97      | 0.32       | 0.00       | 5.66        |
| <b>MAP</b>                            | 119.59     | 76.24      | 1.45       | 3.92       | 0.00        |

## Supplementary references

1. **Otter LB, Guenther A, Greenberg J. 2002.** Seasonal and spatial variations in biogenic hydrocarbon emissions from southern African savannas and woodlands. *Atmospheric Environment* **36**: 4265–4275.
2. **Guenther A, Otter L, Zimmerman P, Greenberg J, Scholes R, Scholes M. 1996.** Biogenic hydrocarbon emissions from southern African savannas. *Journal of Geophysical Research* **101**: 25859–25865.
3. **Harley P, Otter L, Guenther A, Greenberg J. 2003.** Micrometeorological and leaf-level measurements of isoprene emissions from a southern African savanna. *Journal of Geophysical Research: Atmospheres* **108**: D13.
4. **Arey J, Winer AM, Atkinson R, Aschmann SM, Long WD, Morrison CL, Olszyk DM. 1991.** Terpenes emitted from agricultural species found in California's central valley. *Journal of Geophysical Research* **96**: 9329–9336.
5. **Arey J, Crowley DE, Crowley M, Resketo M, Lester J. 1995.** Hydrocarbon emissions from natural vegetation in California South-Coast-Air-Basin. *Atmospheric Environment* **29**: 2977–2988.
6. **Llusià J, Peñuelas J, Gimeno BS. 2002.** Seasonal and species-specific response of VOC emissions by Mediterranean woody plant to elevated ozone concentrations. *Atmospheric Environment* **36**: 3931–3938.
7. **Guenther a., Greenberg J, Harley P, Helmig D, Klinger L, Vierling L, Zimmerman P, Geron C. 1996.** Leaf, branch, stand and landscape scale measurements of volatile organic compound fluxes from U.S. woodlands. *Tree physiology* **16**: 17–24.
8. **Llusià J, Peñuelas J, Gimeno BS. 2002.** Seasonal and species-specific response of VOC emissions by Mediterranean woody plant to elevated ozone concentrations. *Atmospheric Environment* **36**: 3931–3938.

9. **Owen SM, Boissard C, Hewitt CN. 2001.** Volatile organic compounds (VOCs) emitted from 40 Mediterranean plant species: *Atmospheric Environment* **35**: 5393–5409.
10. **Owen SM, Harley P, Guenther A, Hewitt CN. 2002.** Light dependency of VOC emissions from selected Mediterranean plant species. *Atmospheric Environment* **36**: 3147–3159.
11. **Owen S, Boissard C, Street RA, Duckham SC, Csiky O, Hewitt CN. 1997.** Screening of 18 Mediterranean plant species for volatile organic compound emissions. *Atmospheric Environment* **31**: 101–117.
12. **Owen SM, Boissard C, Hagenlocher B, Hewitt CN. 1998.** Field studies of isoprene emissions from vegetation in the northwest Mediterranean region. *Journal of Geophysical Research: Atmospheres* **103**: 25499–25511.
13. **Geron C, Guenther A, Greenberg J, Karl T, Rasmussen R. 2006.** Biogenic volatile organic compound emissions from desert vegetation of the southwestern US. *Atmospheric Environment* **40**: 1645–1660.
14. **Guenther a, Archer S, Greenberg J, Harley P, Helmig D, Vierling L, Zimmerman P. 1999.** Biogenic Hydrocarbon Emissions and Landcover/Climate in a Subtropical Savanna Change. *Phys Chem Earth* **24**: 659–667.
15. **Klinger LF, Li QJ, Guenther AB, Greenberg JP, Baker B, Bai JH. 2002.** Assessment of volatile organic compound emissions from ecosystems of China. *Journal of Geophysical Research Atmospheres* **107**.
16. **Rinnan R, Rinnan Å, Faubert P, Tiiva P, Holopainen JK, Michelsen A. 2011.** Few long-term effects of simulated climate change on volatile organic compound emissions and leaf chemistry of three subarctic dwarf shrubs. *Environmental and Experimental Botany* **72**: 377–386.
17. **Hakola H, Laurila T, Lindfors V, Hellén H, Gaman A, Rinne J. 2001.** Variation of the VOC emission rates of birch species during the growing season. *Boreal Environment Research* **6**: 237–249.

18. **Hakola H, Rinne J, Laurila T. 1998.** The hydrocarbon emission rates of tea-leaved willow (*Salix phylicifolia*), silver birch (*Betula pendula*) and European aspen (*Populus tremula*). *Atmospheric Environment* **32**: 1825–1833.
19. **Tambunan P, Baba S, Kuniyoshi A, Iwasaki H, Nakamura T, Yamasaki H, Oku H. 2006.** Isoprene emission from tropical trees in Okinawa Island, Japan. *Chemosphere* **65**: 2138–2144.
20. **König G, Brunda M, Puxbaum H, Hewitt CN, Duckham SC, Rudolph J. 1995.** Relative contribution of oxygenated hydrocarbons to the total biogenic VOC emissions of selected mid-European agricultural and natural plant species. *Atmospheric Environment* **29**: 861–874.
21. **Llusià J, Peñuelas J, Sardans J, Owen SM, Niinemets Ü. 2010.** Measurement of volatile terpene emissions in 70 dominant vascular plant species in Hawaii: Aliens emit more than natives. *Global Ecology and Biogeography* **19**: 863–874.
22. **Llusià J, Peñuelas J, Gimeno BS. 2002.** Seasonal and species-specific response of VOC emissions by Mediterranean woody plant to elevated ozone concentrations. *Atmospheric Environment* **36**: 3931–3938.
23. **Isebrands J, Guenther AB, Harley P, Helmig D, Klinger L, Vierling L, Zimmerman P, Geron C. 1999.** Volatile organic compound emission rates from mixed deciduous and coniferous forests in Northern Wisconsin, USA. *Atmospheric Environment* **33**: 2527–2536.
24. **Guenther A, Otter L, Zimmerman P, Greenberg J, Scholes R, Scholes M. 1996.** Biogenic hydrocarbon emissions from southern African savannas. *Journal of Geophysical Research* **101**: 25859–25865.
25. **Geron C, Owen S, Guenther A, Greenberg J, Rasmussen R, Hui Bai J, Li QJ, Baker B. 2006.** Volatile organic compounds from vegetation in southern Yunnan Province, China: Emission rates and some potential regional implications. *Atmospheric Environment* **40**: 1759–1773.



26. Hansen U, Van Eijk J, Bertin N, Staudt M, Kotzias D, Seufert G, Fugit JL, Torres L, Cecinato A, Brancaleoni E, *et al.* 1997. Biogenic emissions and Co<sub>2</sub> gas exchange investigated on four Mediterranean shrubs. *Atmospheric Environment* **31**: 157–166.
27. Evans RC, Tingey DT, Gumpertz ML, Burns WF. 1982. Estimates of Isoprene and Monoterpene Emission Rates in Plants. *Botanical Gazette* **143**: 304–310.
28. He C, Murray F, Lyons T. 2000. Monoterpene and isoprene emissions from 15 Eucalyptus species in Australia. *Atmospheric Environment* **34**: 645–655.
29. Street R a, Hewitt CN, Mennicken S. 1997. Isoprene and monoterpene emissions from a Eucalyptus plantation in Portugal. *Journal of Geophy* **102**: 15875–15887.
30. Varshney CK, Singh AP. 2003. Isoprene emission from Indian trees. *Journal of Geophysical Research* **108**: 4803.
31. Winters AJ, Adams MA, Bleby TM, Rennenberg H, Steigner D, Steinbrecher R, Kreuzwieser J. 2009. Emissions of isoprene, monoterpene and short-chained carbonyl compounds from Eucalyptus spp. in southern Australia. *Atmospheric Environment* **43**: 3035–3043.
32. Moukhtar S, Bessagnet B, Rouil L, Simon V. 2005. Monoterpene emissions from Beech (*Fagus sylvatica*) in a French forest and impact on secondary pollutants formation at regional scale. *Atmospheric Environment* **39**: 3535–3547.
33. Demarcke M, Müller JF, Schoon N, Van Langenhove H, Dewulf J, Joó E, Steppe K, Šimpraga M, Heinesch B, Aubinet M, *et al.* 2010. History effect of light and temperature on monoterpenoid emissions from *Fagus sylvatica* L. *Atmospheric Environment* **44**: 3261–3268.
34. Corchnoy SB, Arey J, Atkinson R. 1992. Hydrocarbon emissions from twelve urban shade trees of the Los Angeles, California, Air Basin. *Atmospheric Environment. Part B, Urban Atmosphere* **26**: 339–348.
35. Xiaoshan Z, Yujing M, Wenzhi S, Yahui Z. 2000. Seasonal variations of isoprene

emissions from deciduous trees. *Atmospheric Environment* **34**: 3027–3032.

36. **Llorens L, Llusà J, Murchie EH, Peñuelas J, Beerling DJ. 2009.** Monoterpene emissions and photoinhibition of 'living fossil' trees grown under CO<sub>2</sub> enrichment in a simulated Cretaceous polar environment. *Journal of Geophysical Research: Biogeosciences* **114**.

37. **Karlik JF, M. Winer A. 2001.** Measured isoprene emission rates of plants in California landscapes: Comparison to estimates from taxonomic relationships. *Atmospheric Environment* **35**: 1123–1131.

38. **Arey J, Winer AM, Atkinson R, Aschmann SM, Long WD, Lynn Morrison C. 1991.** The emission of (Z)-3-hexen-1-ol, (Z)-3-hexenylacetate and other oxygenated hydrocarbons from agricultural plant species. *Atmospheric Environment Part A, General Topics* **25**: 1063–1075.

39. **Isidorov VA, Zenkevich IG, Ioffe B V. 1985.** Volatile organic compounds in the atmosphere of forests. *Atmospheric Environment (1967)* **19**: 1–8.

40. **Geron C, Harley P, Guenther A. 2001.** Isoprene emission capacity for US tree species. *Atmospheric Environment* **35**: 3341–3352.

41. **Guenther A, Baugh W, Davis K, Hampton G, Harley P, Klinger L, Vierling L, Zimmerman P, Allwine E, Dilts S, et al. 1996.** Isoprene fluxes measured by enclosure, relaxed eddy accumulation, surface layer gradient, mixed layer gradient, and mixed layer mass balance techniques. *Journal of Geophysical Research* **101**: 18555.

42. **Harley P, Guenther a., Zimmerman P. 1996.** Effects of light, temperature and canopy position on net photosynthesis and isoprene emission from sweetgum (*Liquidambar styraciflua*) leaves. *Tree physiology* **16**: 25–32.

43. **Padhy PK, Varshney CK. 2005.** Isoprene emission from tropical tree species. *Environmental Pollution* **135**: 101–109.

44. **Bracho-Nunez A, Welter S, Staudt M, Kesselmeier J. 2011.** Plant-specific volatile organic compound emission rates from young and mature leaves of Mediterranean

vegetation. *Journal of Geophysical Research Atmospheres* **116**: 1–13.

45. **Grabmer W, Kreuzwieser J, Wisthaler A, Cojocariu C, Graus M, Rennenberg H, Steigner D, Steinbrecher R, Hansel A. 2006.** VOC emissions from Norway spruce (*Picea abies* L. [Karst]) twigs in the field-Results of a dynamic enclosure study. *Atmospheric Environment* **40**: 128–137.

46. **Janson R, De Serves C. 2001.** Acetone and monoterpene emissions from the boreal forest in northern Europe. *Atmospheric Environment* **35**: 4629–4637.

47. **Janson RW. 1993.** Monoterpene emissions from Scots pine and Norwegian spruce. *Journal of Geophysical Research* **98**: 2839.

48. **Janson R, De Serves C, Romero R. 1999.** Emission of isoprene and carbonyl compounds from a boreal forest and wetland in Sweden. *Agricultural and Forest Meteorology* **98–99**: 671–681.

49. **Kempf K, Allwine E, Westberg H, Claiborn C, Lamb B. 1996.** Hydrocarbon emissions from spruce species using environmental chamber and branch enclosure methods. *Atmospheric Environment* **30**: 1381–1389.

50. **Lerdau M, Litvak M, Palmer P, Monson R. 1997.** Controls over monoterpene emissions from boreal forest conifers. *Tree Physiology* **17**: 563–569.

51. **Hayward S, Muncey RJ, James AE, Halsall CJ, Hewitt CN. 2001.** Monoterpene emissions from soil in a Sitka spruce forest. *Atmospheric Environment* **35**: 4081–4087.

52. **Hayward S, Tani A, Owen SM, Hewitt CN. 2004.** Online analysis of volatile organic compound emissions from Sitka spruce (*Picea sitchensis*). *Tree physiology* **24**: 721–728.

53. **Street RA, Duckham SC, Hewitt CN. 1996.** Laboratory and field studies of biogenic volatile organic compound emissions from Sitka spruce (*Picea sitchensis* Bong.) in the United Kingdom. *Journal of Geophysical Research* **101**: 22799–22806.

54. **Street RA, Duckham SC, Hewitt CN. 1996.** Laboratory and field studies of biogenic

volatile organic compound emissions from Sitka spruce (*Picea sitchensis* Bong.) in the United Kingdom. *Journal of Geophysical Research* **101**: 22799–22806.

55. **Blanch JS, Peñuelas J, Llusia J. 2007.** Sensitivity of terpene emissions to drought and fertilization in terpene-storing *Pinus halepensis* and non-storing *Quercus ilex*. *Physiologia Plantarum* **131**: 211–225.

56. **Blanch JS, Llusia J, Niinemets U, Noe SM, Penuelas J. 2011.** Instantaneous and historical temperature effects on  $\alpha$ -pinene emissions in *Pinus halepensis* and *Quercus ilex*. *Journal of Environmental Biology* **32**: 1–6.

57. **Llusia J, Penuelas J. 2000.** Seasonal patterns of terpene content and emission from seven Mediterranean woody species in field conditions. *American Journal of Botany* **87**: 133–140.

58. **Llusia J, Peñuelas J, Alessio GA, Estiarte M. 2008.** Contrasting Species-Specific, Compound-Specific, Seasonal, and Interannual Responses of Foliar Isoprenoid Emissions to Experimental Drought in a Mediterranean Shrubland. *International Journal of Plant Sciences* **169**: 637–645.

59. **Kesselmeier J, Bode K, Hofmann U, Müller H, Schäfer L, Wolf A, Ciccioli P, Brancaleoni E, Cecinato A, Frattoni M, et al. 1997.** Emission of short chained organic acids, aldehydes and monoterpenes from *Quercus ilex* L. and *Pinus pinea* L. in relation to physiological activities, carbon budget and emission algorithms. *Atmospheric Environment* **31**: 119–133.

60. **Núñez L, Plaza J, Pérez-Pastor R, Pujadas M, Gimeno BS, Bermejo V, García-Alonso S. 2002.** High water vapour pressure deficit influence on *Quercus ilex* and *Pinus pinea* field monoterpene emission in the central Iberian Peninsula (Spain). *Atmospheric Environment* **36**: 4441–4452.

61. **Sabillón D, Cremades L V. 2001.** Diurnal and seasonal variation of monoterpene emission rates for two typical Mediterranean species (*Pinus pinea* and *Quercus ilex*) from field measurements - Relationship with temperature and PAR. *Atmospheric Environment* **35**: 4419–4431.

62. **Staudt M. 1997.** Untersuchungen der Monoterpen-Abgabe an europäischen Nadelbaumarten in Abhängigkeit von Umweltfaktoren, *Documenta Naturae*, **111**, Ph.D. thesis, University of Stuttgart-Hohenheim, 166 pp.
63. **Street R a, Owen S, Duckham SC, Boissard C, Hewitt CN. 1997.** Effect of habitat and age on variations in volatile organic compound (VOC) emissions from *Quercus ilex* and *Pinus pinea*. *Atmospheric Environment* **31**: 89–100.
64. **Komenda M, Koppmann R. 2002.** Monoterpene emissions from Scots pine (*Pinus sylvestris*): Field studies of emission rate variabilities. *Journal of Geophysical Research Atmospheres* **107**.
65. **Komenda M, Kobel K, Koppmann R, Wildt J. 2003.** Comparability of biogenic VOC emission rate measurements under laboratory and ambient conditions at the example of monoterpene emissions from Scots pine (*Pinus sylvestris*). *Journal of Atmospheric Chemistry* **45**: 1–23.
66. **Rinne J, Tuovinen JP, Laurila T, Hakola H, Aurela M, Hypén H. 2000.** Measurements of hydrocarbon fluxes by a gradient method above a northern boreal forest. *Agricultural and Forest Meteorology* **102**: 25–37.
67. **Räisänen T, Ryyppö A, Kellomäki S. 2009.** Monoterpene emission of a boreal Scots pine (*Pinus sylvestris* L.) forest. *Agricultural and Forest Meteorology* **149**: 808–819.
68. **Drewitt G., Curren K, Steyn D., Gillespie T., Niki H. 1998.** Measurement of biogenic hydrocarbon emissions from vegetation in the Lower Fraser Valley, British Columbia. *Atmospheric Environment* **32**: 3457–3466.
69. **Guidolotti G, Calfapietra C, Loreto F. 2011.** The relationship between isoprene emission, CO<sub>2</sub> assimilation and water use efficiency across a range of poplar genotypes. *Physiologia Plantarum* **142**: 297–304.
70. **Niinemets Ü, Copolovici L, Hüve K. 2010.** High within-canopy variation in isoprene emission potentials in temperate trees: Implications for predicting canopy-

scale isoprene fluxes. *Journal of Geophysical Research: Biogeosciences* **115**: 1–19.

71. **Fuentes JD, Wang D, Den Hartog G, Neumann HH, Dann TF, Puckett KJ. 1995.** Modelled and field measurements of biogenic hydrocarbon emissions from a Canadian deciduous forest. *Atmospheric Environment* **29**: 3003–3017.

72. **Monson RK, Fall R. 1989.** Isoprene emission from aspen leaves : influence of environment and relation to photosynthesis and photorespiration. *Plant physiology* **90**: 267–274.

73. **Constable JVH, Litvak ME, Greenberg JP, Monson RK. 1999.** Monoterpene emission from coniferous trees in response to elevated CO<sub>2</sub> concentration and climate warming. *Global change biology* **5**: 255–267.

74. **Litvak ME, Madronich S, Monson RK. 1998.** The potential impact of herbivore-induced monoterpene emissions from coniferous forests on local tropospheric chemistry dynamics. *Ecological Applications* **9**: 1147–1159.

75. **Pressley S, Lamb B, Westberg H, Guenther A, Chen J, Allwine E. 2004.** Monoterpene emissions from a Pacific Northwest Old-Growth Forest and impact on regional biogenic VOC emission estimates. *Atmospheric Environment* **38**: 3089–3098.

76. **Joó É, Dewulf J, Amelynck C, Schoon N, Pokorska O, Šimpraga M, Steppe K, Aubinet M, Van Langenhove H. 2011.** Constitutive versus heat and biotic stress induced BVOC emissions in *Pseudotsuga menziesii*. *Atmospheric Environment* **45**: 3655–3662.

77. **Csiky O, Seufert G. 1999.** Terpenoid emissions of oaks and their relation to taxonomy. *Ecological Applications* **9.4**: 1138.

78. **Lenz R, Selige T, Seufert G. 1997.** Scaling up the biogenic emissions from test sites at Castelporziano. *Atmospheric Environment* **31**: 239–250.

79. **Steinbrecher R, Hauff K, Rabong R, Steinbrecher J. 1997.** Isoprenoid emission of oak species typical for the Mediterranean area: Source strength and controlling variables. *Atmospheric Environment* **31**: 79–88.

80. **Staudt M, Lhoutellier L. 2011.** Monoterpene and sesquiterpene emissions from *Quercus coccifera* exhibit interacting responses to light and temperature. *Biogeosciences* **8**: 2757–2771.
81. **Harley P, Guenther a, Zimmerman P. 1997.** Environmental controls over isoprene emission in deciduous oak canopies. *Tree physiology* **17**: 705–14.
82. **Bertin N, Staudt M, Hansen U, Seufert G, Ciccioli P, Foster P, Fugit JL, Torres L. 1997.** Diurnal and seasonal course of monoterpene emissions from *Quercus ilex* (L.) under natural conditions application of light and temperature algorithms. *Atmospheric Environment* **31**: 135–144.
83. **Kesselmeier J, Schäfer L, Ciccioli P, Brancaleoni E, Cecinato A, Frattoni M, Foster P, Jacob V, Denis J, Fugit JL, et al. 1996.** Emission of monoterpenes and isoprene from a Mediterranean oak species *Quercus ilex* L. measured within the BEMA (Biogenic Emissions in the Mediterranean Area) project. *Atmospheric Environment* **30**: 1841–1850.
84. **Kesselmeier J. BK. SL. SG. W a. . BE. C a. . CP. FM. DL. FJL. SV. T. 1998.** Simultaneous field measurements of terpene and isoprene emissions from two dominant mediterranean oak species in relation to a North American species - effect of habitat and age on variations in emissions from *Quercus ilex* and *Pinus pinea*. *Atmospheric Environment* **32**: 1947–1953.
85. **Simon V, Dutaur L, Brouarddarmais S, Riba ML, Torres L. 1998.** Biogenic emissions by oak trees common to Mediterranean ecosystems. In: Environmental Monitoring and Assessment. 131–139.
86. **Staudt M, Joffre R, Rambal S, Kesselmeier J. 2001.** Effect of elevated CO<sub>2</sub> on monoterpene emission of young *Quercus ilex* trees and its relation to structural and ecophysiological parameters. *Tree physiology* **21**: 437–45.
87. **Lavoit A V., Staudt M, Schnitzler JP, Landais D, Massol F, Rocheteau A, Rodriguez R, Zimmer I, Rambal S. 2009.** Drought reduced monoterpene emissions from *Quercus ilex* trees: results from a throughfall displacement experiment within a

forest ecosystem. *Biogeosciences Discussions* **6**: 863–893.

88. **Peñuelas J, Filella I, Seco R, Llusà J. 2009.** Increase in isoprene and monoterpene emissions after re-watering of droughted *Quercus ilex* seedlings. *Biologia Plantarum* **53**: 351–354.

89. **Peñuelas J, Llusà J. 1999.** Seasonal emission of monoterpenes by the Mediterranean tree *Quercus ilex* in field conditions: relations with photosynthetic rates, temperature and volatility. *Physiologia Plantarum* **105**: 641–647.

90. **Tani A, Kawawata Y. 2008.** Isoprene emission from the major native *Quercus* spp. in Japan. *Atmospheric Environment* **42**: 4540–4550.

91. **Pérez-Rial D, Peñuelas J, López-Mahía P, Llusà J. 2009.** Terpenoid emissions from *Quercus robur*. A case study of Galicia (NW Spain). *Journal of environmental monitoring : JEM* **11**: 1268–1275.

92. **Boissard C, Cao XL, Juan CY, Hewitt CN, Gallagher M. 2001.** Seasonal variations in VOC emission rates from gorse (*Ulex europaeus*). *Atmospheric Environment* **35**: 917–927.

93. **Heath K, Cao X, Boissard C, Juan a J, Hewitt CN, Gallagher M. 1997.** Biogenic emissions of volatile organic compounds from gorse frequently used method for the determination of and requires a minimum concentration or mass difference Copyright Zielinska , The branch enclosure technique is the concentrations at two or more h. *Journal of Geophysical Research* **102**: 18903–18915.
